# Supplementary material for: Upper Body Physical Rehabilitation for Children with Ataxia through IMU-Based Exergame
Source: J Clin Med. 2022 Feb 18;11(4):1065. doi: 10.3390/jcm11041065 (PMC8876617; doi:10.3390/jcm11041065)
Supplement: Supplementary file 1 [file jcm-11-01065-s001.zip › Table S1.pdf]

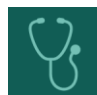

**Table S1.** Adherence individual data for each participant and related descriptive statistics.

|                                     |      | Exercises |               |                        |                         |                      |                       |                             | Descriptive statistics for participant |                   |       |        |        |
|-------------------------------------|------|-----------|---------------|------------------------|-------------------------|----------------------|-----------------------|-----------------------------|----------------------------------------|-------------------|-------|--------|--------|
|                                     |      | Pt.       | Elbow flexion | Shoulder 90° abduction | Shoulder 180° abduction | Shoulder 90° flexion | Shoulder 180° flexion | Ipsilateral target reaching | Controlateral target reaching          | Trunk oscillation | Avg.  | SD     | Max    |
| Participants                        | 1    | 60.0%     | 56.7%         | 44.0%                  | 51.7%                   | 40.0%                | 50.1%                 | 50.0%                       | 30.0%                                  | 47.8%             | 9.6%  | 60.0%  | 30.0%  |
|                                     | 2    | 5.0%      | 80.0%         | 80.0%                  | 78.3%                   | 77.8%                | 81.8%                 | 80.0%                       | 75.0%                                  | 69.7%             | 26.2% | 81.8%  | 5.0%   |
|                                     | 3    | 76.7%     | 70.0%         | 48.0%                  | 75.0%                   | 86.7%                | 54.5%                 | 65.0%                       | 80.0%                                  | 69.5%             | 13.1% | 86.7%  | 48.0%  |
|                                     | 4    | 41.7%     | 51.7%         | 42.0%                  | 46.7%                   | 44.4%                | 58.2%                 | 33.3%                       | 50.0%                                  | 46.0%             | 7.5%  | 58.2%  | 33.3%  |
|                                     | 5    | 100.0%    | 100.0%        | 100.0%                 | 100.0%                  | 100.0%               | 100.0%                | 100.0%                      | 100.0%                                 | 100.0%            | 0.0%  | 100.0% | 100.0% |
|                                     | 6    | 91.7%     | 65.0%         | 86.0%                  | 81.7%                   | 84.4%                | 94.5%                 | 86.7%                       | 77.5%                                  | 83.4%             | 9.2%  | 94.5%  | 65.0%  |
|                                     | 7    | 20.0%     | 35.0%         | 22.0%                  | 33.3%                   | \                    | 27.3%                 | 26.7%                       | 10.0%                                  | 24.9%             | 8.5%  | 35.0%  | 10.0%  |
|                                     | 8    | 93.3%     | 90.0%         | 88.0%                  | 88.3%                   | 91.1%                | 85.4%                 | 96.7%                       | 82.5%                                  | 89.4%             | 4.4%  | 96.7%  | 82.5%  |
|                                     | 9    | 18.3%     | 28.3%         | 12.0%                  | 25.0%                   | 4.4%                 | 23.6%                 | 26.7%                       | 2.5%                                   | 17.6%             | 10.2% | 28.3%  | 2.5%   |
| Descriptive statistics for exercise | Avg. | 56.3%     | 64.1%         | 58.0%                  | 64.4%                   | 66.1%                | 63.9%                 | 62.8%                       | 56.4%                                  |                   |       |        |        |
|                                     | SD   | 36.3%     | 23.9%         | 31.4%                  | 26.1%                   | 33.0%                | 28.1%                 | 29.7%                       | 34.9%                                  |                   |       |        |        |
|                                     | Max  | 100.0%    | 100.0%        | 100.0%                 | 100.0%                  | 100.0%               | 100.0%                | 100.0%                      | 100.0%                                 |                   |       |        |        |
|                                     | Min  | 5.0%      | 28.3%         | 12.0%                  | 25.0%                   | 4.4%                 | 23.6%                 | 26.7%                       | 2.5%                                   |                   |       |        |        |

Abbreviation list: Pt. = Participants; Avg. = Average; SD = Standard Deviation; Max = Maximum; Min = Minimum.

\: exercise not performed due to technical issues.
