# Supplementary material for: Upper Body Physical Rehabilitation for Children with Ataxia through IMU-Based Exergame
Source: J Clin Med. 2022 Feb 18;11(4):1065. doi: 10.3390/jcm11041065 (PMC8876617; doi:10.3390/jcm11041065)
Supplement: Supplementary file 1 [file jcm-11-01065-s001.zip › Table S2.pdf]

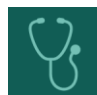

**Table S2.** Participants' individual scores for each outcome measure.

|       |     | SARA Scores |    |        |    |         |    |                    |    |              |    |                  |     |                                 |     |                 |     |                  |      |    |
|-------|-----|-------------|----|--------|----|---------|----|--------------------|----|--------------|----|------------------|-----|---------------------------------|-----|-----------------|-----|------------------|------|----|
| Group | Pt. | Gait        |    | Stance |    | Sitting |    | Speech disturbance |    | Finger Chase |    | Nose-finger test |     | Fast alternating hand movements |     | Heel-shin slide |     | SARA Total score |      |    |
|       |     | T0          | T1 | T0     | T1 | T0      | T1 | T0                 | T1 | T0           | T1 | T0               | T1  | T0                              | T1  | T0              | T1  | T0               | T1   |    |
| IG    | 1   | 2           | 2  | 1      | 1  | 0       | 0  | 2                  | 2  | 1            | 1  | 1                | 1   | 3                               | 3   | 1               | 1   | 11               | 11   |    |
|       | 2   | 3           | 3  | 1      | 1  | 0       | 0  | 1                  | 1  | 1            | 1  | 0                | 0   | 1                               | 1   | 1               | 1.5 | 8                | 8.5  |    |
|       | 3   | 3           | 2  | 0      | 1  | 0       | 0  | 1                  | 1  | 1            | 1  | 1                | 1   | 3                               | 3   | 1               | 1   | 10               | 10   |    |
|       | 4   | 1           | 1  | 0      | 0  | 0       | 0  | 0                  | 0  | 0            | 0  | 1                | 1   | 1.5                             | 1.5 | 0.5             | 0.5 | 4                | 4    |    |
|       | 5   | 1           | 1  | 0      | 0  | 0       | 0  | 2                  | 2  | 1            | 1  | 1                | 1   | 3                               | 3   | 1               | 1   | 9                | 9    |    |
|       | 6   | 2           | 3  | 2      | 2  | 1       | 0  | 0                  | 1  | 1            | 1  | 1                | 1   | 1                               | 3   | 1               | 2   | 2                | 11   | 12 |
|       | 7   | 2           | 3  | 2      | 2  | 0       | 0  | 1                  | 1  | 1            | 1  | 1                | 1   | 1                               | 1.5 | 2               | 2   | 10               | 11.5 |    |
|       | 8   | 2           | 3  | 2      | 2  | 0       | 0  | 2                  | 1  | 0.5          | 1  | 1                | 1   | 0                               | 1   | 1.5             | 2   | 9                | 11   |    |
|       | 9   | 2           | 1  | 1      | 1  | 0       | 0  | 1                  | 1  | 1            | 1  | 1                | 1   | 2.5                             | 2.5 | 2               | 2   | 10.5             | 9.5  |    |
| CG    | 10  | 1           | 2  | 1      | 1  | 0       | 0  | 1                  | 1  | 1            | 1  | 1                | 1   | 1                               | 1.5 | 2               | 2   | 8                | 9.5  |    |
|       | 11  | 1           | 2  | 1      | 1  | 0       | 0  | 1                  | 1  | 1            | 0  | 1                | 1   | 0                               | 0   | 0               | 0   | 5                | 5    |    |
|       | 12  | 1           | 2  | 1      | 1  | 0       | 0  | 0                  | 0  | 1            | 1  | 1                | 1   | 1                               | 1   | 1               | 1   | 6                | 7    |    |
|       | 13  | 2           | 2  | 2      | 2  | 0       | 0  | 2                  | 2  | 1            | 1  | 1                | 1.5 | 3                               | 3   | 1.5             | 2   | 12.5             | 13.5 |    |
|       | 14  | 2           | 2  | 2      | 2  | 0       | 0  | 2                  | 3  | 1            | 1  | 1.5              | 1   | 3                               | 3   | 3.5             | 3   | 15               | 15   |    |
|       | 15  | 3           | 3  | 3      | 3  | 0       | 1  | 1                  | 1  | 1            | 1  | 1.5              | 1   | 3                               | 3   | 2.5             | 3   | 15               | 16   |    |
|       | 16  | 1           | 2  | 2      | 1  | 0       | 0  | 1                  | 1  | 0.5          | 1  | 1                | 1   | 0.5                             | 0.5 | 1.5             | 2   | 7.5              | 8.5  |    |
|       | 17  | 3           | 1  | 2      | 1  | 1       | 2  | 0                  | 3  | 1            | 3  | 1                | 3   | 1                               | 1   | 3               | 1   | 12               | 15   |    |
|       | 18  | 2           | 2  | 2      | 2  | 0       | 0  | 1                  | 1  | 1            | 1  | 0                | 0   | 3                               | 3   | 1               | 1   | 10               | 10   |    |



Table S2. Continue.

| Group | Pt. | T25FW |     | 9HPT Dominant hand |      | 9HPT Non-dominant hand |      |
|-------|-----|-------|-----|--------------------|------|------------------------|------|
|       |     | T0    | T1  | T0                 | T1   | T0                     | T1   |
| IG    | 1   | 6.4   | 6.1 | 43.7               | 38.3 | 44.8                   | 42.3 |
|       | 2   | 7.7   | 5.8 | 31.3               | 29.1 | 32.5                   | 31.3 |
|       | 3   | 4.6   | 4.9 | 39.3               | 37.3 | 41.5                   | 37.6 |
|       | 4   | 4.8   | 5.3 | 28.3               | 25.2 | 28.1                   | 28.4 |
|       | 5   | 5.2   | 5.4 | 42.1               | 41.0 | 48.3                   | 49.7 |
|       | 6   | 4.9   | 4.7 | 35.8               | 33.4 | 40.8                   | 35.5 |
|       | 7   | 4.7   | 5.5 | 29.4               | 33.4 | 33.2                   | 35.8 |
|       | 8   | 5.2   | 4.9 | 36.4               | 32.0 | 35.7                   | 34.8 |
|       | 9   | 4.6   | 4.8 | 54.9               | 44.4 | 57.2                   | 49.5 |
| CG    | 10  | 5.4   | 5.5 | 36.9               | 43.2 | 47.4                   | 56.3 |
|       | 11  | 5.2   | 5.1 | 34.1               | 31.3 | 36.4                   | 35.6 |
|       | 12  | 5.8   | 4.3 | 24.6               | 24.6 | 30.7                   | 31.3 |
|       | 13  | 7.9   | 7.4 | 46.0               | 50.0 | 41.7                   | 43.0 |
|       | 14  | 5.9   | 5.3 | 54.0               | 60.0 | 62.5                   | 61.3 |
|       | 15  | 6.9   | 6.8 | 47.9               | 51.8 | 53.7                   | 55.7 |
|       | 16  | 5.1   | 5.3 | 32.7               | 34.1 | 36.0                   | 41.7 |
|       | 17  | 9.1   | 7.9 | 39.4               | 40.5 | 46.2                   | 45.9 |
|       | 18  | 5.1   | 6.0 | 36.1               | 42.0 | 52.4                   | 48.7 |

Abbreviation list: IG = Intervention Group; CG = Control Group; Pt = Participants; T0 = pre-intervention evaluation; T1 = post-intervention evaluation; SARA = Scale for the Assessment and Rating of Ataxia; T25FW = Timed 25-Foot Walk; 9HPT = 9-Hole Peg Test.
